# Supplementary material
Source: MDPI journal article supplement (https://www.mdpi.com/2071-1050/15/1/874)
Supplement: s1 [file s1]

## **Supporting Materials**

# **The removal of tetracycline from aqueous solutions using peanut shell biochars prepared at different pyrolysis temperatures**

**Zhichao Shi <sup>1</sup>, Aowen Ma <sup>1</sup>, Yuanhang Chen <sup>1</sup>, Menghan Zhang <sup>1</sup>, Yin Zhang <sup>1</sup>, Na Zhou <sup>1</sup>, Shisuo Fan <sup>1,\*</sup> and Yi Wang<sup>2,\*</sup>**

<sup>1</sup> School of Resources and Environment, Anhui Agricultural University, Hefei, 230036, China

<sup>2</sup> Key Laboratory of Agri-Food Safety of Anhui Province, Anhui Agricultural University, Hefei, 230036, China

\* Correspondence: fanshisuo@ahau.edu.cn, wangyi@ahau.edu.cn; Tel.: Tel/Fax: +86 551 65786311

**Table S1** Comparison of the adsorption capacity of TC on other pristine biochars

| Feedstocks                 | Temperature (°C)  | Adsorption capacity (mgg <sup>-1</sup> ) | References |
|----------------------------|-------------------|------------------------------------------|------------|
| Peanut shell               | 400 and 700       | 26.4185 and 33.4346                      | This study |
| Auricularia auricula dregs | 300, 500, and 700 | 7.22, 9.90, 11.90                        | [1]        |
| Sludge                     | 600               | 126.14                                   | [2]        |
| Cow manure                 | 300, 500, and 700 | 26.727, 15.061, and 22.553               | [3]        |
| Spirulina sp. (microalgae) | 750               | 147.9                                    | [4]        |
| Peanut shell               | 700               | 51.75                                    | [5]        |
| Peanut shell               | 300 and 700       | 12 and 32                                | [6]        |
| Tea waste                  | 700               | 10.88                                    | [7]        |
| wheat stalk                | 300, 450, 600     | 17.19, 21.19, 21.29                      | [8]        |
| hay                        | 500               | 372.31 and 44.24                         | [9]        |
| Rice straw                 | 700               | 29                                       | [10]       |

#### References

1. Dai, Y.; Li, J.; Shan, D., Adsorption of tetracycline in aqueous solution by biochar derived from waste *Auricularia auricula* dregs. *Chemosphere* **2020**, 238, 124432.
2. Liu, H.; Xu, G.; Li, G., The characteristics of pharmaceutical sludge-derived biochar and its application for the adsorption of tetracycline. *Sci. Total Environ.* **2020**, 747, 141492.
3. Zhang, P.; Li, Y.; Cao, Y.; Han, L., Characteristics of tetracycline adsorption by cow manure biochar prepared at different pyrolysis temperatures. *Bioresour. Technol.* **2019**, 285, 121348.
4. Choi, Y.-K.; Choi, T.-R.; Gurav, R.; Bhatia, S. K.; Park, Y.-L.; Kim, H. J.; Kan, E.; Yang, Y.-H., Adsorption behavior of tetracycline onto *Spirulina* sp. (microalgae)-derived biochars produced at different temperatures. *Sci. Total Environ.* **2020**, 710, 136282.
5. Zhang, Y.; Xu, J.; Li, B.; Xie, Z. X.; Li, X. D.; Tang, J.; Fan, S. S., Enhanced adsorption performance of tetracycline in aqueous solutions by KOH-modified peanut shell-derived biochar. *Biomass Convers. Biorefin.* **2021**.
6. Ahmad, M.; Lee, S. S.; Dou, X. M.; Mohan, D.; Sung, J. K.; Yang, J. E.; Ok, Y. S., Effects of pyrolysis temperature on soybean stover- and peanut shell-derived biochar properties and TCE adsorption in water. *Bioresour. Technol.* **2012**, 118, 536-544.
7. Li, B.; Zhang, Y.; Xu, J.; Mei, Y.; Fan, S.; Xu, H., Effect of carbonization methods on the properties of tea waste biochars and their application in tetracycline removal from aqueous solutions. *Chemosphere* **2021**, 267, 129283.
8. Xiang, W.; Wan, Y.; Zhang, X.; Tan, Z.; Xia, T.; Zheng, Y.; Gao, B., Adsorption of tetracycline hydrochloride onto ball-milled biochar: Governing factors and mechanisms. *Chemosphere* **2020**, 255, 127057.
9. Jang, H. M.; Kan, E., A novel hay-derived biochar for removal of tetracyclines in water. *Bioresour. Technol.* **2019**, 274, 162-172.

10. Mei, Y.; Xu, J.; Zhang, Y.; Li, B.; Fan, S.; Xu, H., Effect of Fe–N modification on the properties of biochars and their adsorption behavior on tetracycline removal from aqueous solution. *Bioresour. Technol.* **2021**, 325, 124732.

**Table S2** Comparison of the adsorption capacity of TC on other modified biochars

| Feedstocks        | Modification                                             | Temperature (°C) | Adsorption capacity (mgg <sup>-1</sup> ) | References |
|-------------------|----------------------------------------------------------|------------------|------------------------------------------|------------|
| Peanut shell      | No modification                                          | 400 and 700      | 26.4185 and 33.4346                      | This study |
| Peanut shell      | KOH                                                      | 700              | 272.2                                    | [1]        |
| Tea waste         | KHCO <sub>3</sub> +FeCl <sub>3</sub>                     | 800              | 333.22                                   | [2]        |
| Pinus taeda       | NaOH                                                     | 800              | 274.81                                   | [3]        |
| Wheat straw       | KOH+KMnO <sub>4</sub>                                    | 700              | 584.19                                   | [4]        |
| Sludge            | hydrothermal pretreatment                                | 600              | 168.3                                    | [5]        |
| Tea waste         | hydrothermal treatment with KHCO <sub>3</sub> activation | 700              | 451.45                                   | [6]        |
| wheat stalk       | Ball-milling treatment                                   | 300, 450, 600    | 51.04, 96.69, 75.95                      | [7]        |
| Sludge            | ZnCl <sub>2</sub> +FeCl <sub>3</sub>                     | 600              | 145                                      | [8]        |
| Rice husk         | KOH                                                      | 500              | 58.82                                    | [9]        |
| Eucommia ulmoides | K <sub>2</sub> SO <sub>3</sub>                           | 700              | 1163                                     | [10]       |
| Rice straw        | Urea+FeCl <sub>3</sub>                                   | 700              | 156                                      | [11]       |

#### References

1. Zhang, Y.; Xu, J.; Li, B.; Xie, Z. X.; Li, X. D.; Tang, J.; Fan, S. S., Enhanced adsorption performance of tetracycline in aqueous solutions by KOH-modified peanut shell-derived biochar. *Biomass Convers. Biorefin.* **2021**.
2. Li, B.; Zhang, Y.; Xu, J.; Fan, S.; Xu, H., Facile preparation of magnetic porous biochars from tea waste for the removal of tetracycline from aqueous solutions: Effect of pyrolysis temperature. *Chemosphere* **2022**, 291, 132713.
3. Jang, H. M.; Yoo, S.; Choi, Y.-K.; Park, S.; Kan, E., Adsorption isotherm, kinetic modeling and mechanism of tetracycline on Pinus taeda-derived activated biochar. *Bioresour. Technol.* **2018**, 259, 24-31.
4. Xu, J.; Zhang, Y.; Li, B.; Fan, S.; Xu, H.; Guan, D.-X., Improved adsorption properties of tetracycline

on KOH/KMnO<sub>4</sub> modified biochar derived from wheat straw. *Chemosphere* **2022**, 296, 133981.

5. Chen, W.; Zhao, B.; Guo, Y.; Guo, Y.; Zheng, Z.; Pak, T.; Li, G., Effect of hydrothermal pretreatment on pyrolyzed sludge biochars for tetracycline adsorption. *J. Environ. Chem. Eng.* 2021, 9, (6), 106557.
6. Li, B.; Zhang, Y.; Xu, J.; Mei, Y.; Fan, S.; Xu, H., Effect of carbonization methods on the properties of tea waste biochars and their application in tetracycline removal from aqueous solutions. *Chemosphere* **2021**, 267, 129283.
7. Xiang, W.; Wan, Y.; Zhang, X.; Tan, Z.; Xia, T.; Zheng, Y.; Gao, B., Adsorption of tetracycline hydrochloride onto ball-milled biochar: Governing factors and mechanisms. *Chemosphere* **2020**, 255, 127057.
8. Ma, Y.; Li, M.; Li, P.; Yang, L.; Wu, L.; Gao, F.; Qi, X.; Zhang, Z., Hydrothermal synthesis of magnetic sludge biochar for tetracycline and ciprofloxacin adsorptive removal. *Bioresour. Technol.* 2021, 319, 124199.
9. Liu, P.; Liu, W.-J.; Jiang, H.; Chen, J.-J.; Li, W.-W.; Yu, H.-Q., Modification of bio-char derived from fast pyrolysis of biomass and its application in removal of tetracycline from aqueous solution. *Bioresour. Technol.* **2012**, 121, 235-240.
10. Chen, Y.; Liu, J.; Zeng, Q.; Liang, Z.; Ye, X.; Lv, Y.; Liu, M., Preparation of *Eucommia ulmoides* lignin-based high-performance biochar containing sulfonic group: Synergistic pyrolysis mechanism and tetracycline hydrochloride adsorption. *Bioresour. Technol.* **2021**, 329, 124856.
11. Mei, Y.; Xu, J.; Zhang, Y.; Li, B.; Fan, S.; Xu, H., Effect of Fe-N modification on the properties of biochars and their adsorption behavior on tetracycline removal from aqueous solution. *Bioresour. Technol.* **2021**, 325, 124732.
